# Supplementary material
Source: bioRxiv or medRxiv preprint supplement (https://medrxiv.org/highwire/filestream/90328/field_highwire_adjunct_files/0/2020.07.19.20157115-1.pdf)
Supplement: Supplementary file [file 2020.07.19.20157115-1.pdf]

## Appendix A: Tables

Table - A.1 The Important parameters for the epidemic model

| Parameter | Meaning                                                          |
|-----------|------------------------------------------------------------------|
| $t_o$     | The starting time for the epidemic                               |
| $t_1$     | The time when the first case showed up                           |
| $\tau$    | Transmission rate                                                |
| $1/\nu$   | Incubation period                                                |
| $f$       | The percentage of pre-Symptomatic cases that become symptomatic. |
| $1/\eta$  | The recovery period                                              |
| $S_o$     | The susceptible population at time $t_o$                         |
| $I_o$     | Number of the pre-symptomatic at time $t_o$                      |
| $U_1$     | Number of the unreported asymptomatic at time $t_1$              |
| $A_1$     | Number of active symptomatic cases at time $t_1$                 |

Table - A.2 Reported cases May/24 – June/4 for Libya, reported by Libyan National Center for Disease Control <sup>1,2</sup>

| Day              | 1    | 2    | 3    | 4    | 5    | 6    | 7    | 8    | 9   | 10  | 11  | 12  |
|------------------|------|------|------|------|------|------|------|------|-----|-----|-----|-----|
| Date             | 24/5 | 25/5 | 26/5 | 27/5 | 28/5 | 29/5 | 30/5 | 31/5 | 1/6 | 2/6 | 3/6 | 4/6 |
| Active Cases     | 32   | 32   | 34   | 55   | 59   | 72   | 75   | 99   | 111 | 125 | 139 | 152 |
| Cumulative Cases | 75   | 75   | 77   | 99   | 105  | 118  | 130  | 156  | 168 | 182 | 196 | 209 |

## Appendix B: Least square regression with numerical integration

Let's assume we have a set of data  $(t_1, y_1), (t_2, y_2), \dots, (t_k, y_k), \dots, (t_n, y_n)$ . The data is arranged in ascending order of  $t_k$  and we want to fit this data to the function.

$$y(t) = \alpha_1 \exp(\alpha_2 t) - \alpha_3 \quad A.1$$

Let's take the integration for the function  $y(t)$

$$\int_{t_1}^t y(u) du = \int_{t_1}^t (\alpha_1 \exp(\alpha_2 u) - \alpha_3) du = \frac{\alpha_1}{\alpha_2} \exp(\alpha_2 t) - \frac{\alpha_1}{\alpha_2} \exp(\alpha_2 t_1) - \alpha_3(t - t_1)$$
$$\int_{t_1}^t y(u) du = \frac{1}{\alpha_2} (y + \alpha_3) - \frac{\alpha_1}{\alpha_2} \exp(\alpha_2 t_1) - \alpha_3(t - t_1) \quad A.2$$

Rearranging equation A.2 yields

$$y - y_1 = \alpha_2 \alpha_3 (t - t_1) + \alpha_2 \int_{t_1}^t y(u) du \quad A.3$$

The integral on equation A.3 can be evaluated approximately by using numerical integration methods such as trapezoidal rule<sup>3</sup>. Therefore, substituting for  $t$  by  $t_k$ .

$$S_k = \int_{t_1}^{t_k} y(u) du = \begin{cases} 0 & \text{for } k = 1 \\ S_{k-1} + \frac{1}{2} (y_k + y_{k-1}) (x_k - x_{k-1}) & \text{for } k = 2 \rightarrow n \end{cases} \quad A.4$$

From equations A.3 and A.4 we get

$$y_k - y_1 = \alpha_2 \alpha_3 (t_k - t_1) + \alpha_2 S_k \quad A.5$$

The square of the error can be estimated using equation A.5 as

$$\varepsilon^2 = \sum_{k=1}^n (\alpha_2 \alpha_3 (t_k - t_1) + \alpha_2 S_k - (y_k - y_1))^2 \quad A.6$$

Now we can do the regression process where we need to minimize the error with respect to the constants  $\alpha_2$  and  $\alpha_1$ . For the error to be minimum we have to set  $\frac{\partial \varepsilon^2}{\partial \alpha_2} = 0$  and  $\frac{\partial \varepsilon^2}{\partial \alpha_3} = 0$  we get two equations in two unknown as

$$\alpha_2 \alpha_3 \sum_{k=1}^n (t_k - t_1) S_k + \alpha_2 \sum_{k=1}^n S_k^2 = \sum_{k=1}^n (y_k - y_1) S_k \quad A.7$$

$$\alpha_2 \alpha_3 \sum_{k=1}^n (t_k - t_1)^2 + \alpha_2 \sum_{k=1}^n (t_k - t_1) S_k = \sum_{k=1}^n (y_k - y_1) (t_k - t_1) \quad A.8$$

Writing both equations in matrix form, the solution for  $\alpha_2$  and  $\alpha_3$  can be expressed as

$$\begin{bmatrix} \alpha_2 \alpha_3 \\ \alpha_2 \end{bmatrix} = \begin{bmatrix} \sum_{k=1}^n (t_k - t_1) S_k & \sum_{k=1}^n S_k^2 \\ \sum_{k=1}^n (t_k - t_1)^2 & \sum_{k=1}^n (t_k - t_1) S_k \end{bmatrix}^{-1} \begin{bmatrix} \sum_{k=1}^n (y_k - y_1) S_k \\ \sum_{k=1}^n (y_k - y_1) (t_k - t_1) \end{bmatrix} \quad A.9$$

Solving equation A.9 will yield  $\alpha_2$  and  $\alpha_3$ , we keep  $\alpha_2$  and discard  $\alpha_3$ . Now that we have a good estimate for  $\alpha_2$  we go back to equation A.1 and we apply the least square regression method when  $\alpha_2$  is known and  $\alpha_1, \alpha_3$  are unknown. We will get the following equation for the error

$$\varepsilon^2 = \sum_{k=1}^n (\alpha_1 \exp(\alpha_2 t_k) - \alpha_3 - y_k)^2 \quad A.10$$

Applying the least square method again to equation A.10 by taking  $\frac{\partial \varepsilon^2}{\partial \alpha_1} = 0$  and  $\frac{\partial \varepsilon^2}{\partial \alpha_3} = 0$  we get the equations

$$\begin{bmatrix} \alpha_1 \\ \alpha_3 \end{bmatrix} = \begin{bmatrix} \sum_{k=1}^n \exp(2\alpha_2 t_k) & -\sum_{k=1}^n \exp(\alpha_2 t_k) \\ \sum_{k=1}^n \exp(\alpha_2 t_k) & -n \end{bmatrix}^{-1} \begin{bmatrix} \sum_{k=1}^n y_k \exp(\alpha_2 t_k) \\ \sum_{k=1}^n y_k \end{bmatrix} \quad A.11$$

Solving equations A.11 we can get  $\alpha_1$  and  $\alpha_3$

### Appendix C. Solution of ordinary linear differential equation of first order.

Let's assume that we have a linear differential equation in the form

$$\frac{dy}{dt} + a(t)y = h(t) \quad B.1$$

We attempt to solve this equation by determining an integrating factor  $p(t)$  such that

$$\frac{d}{dt}(py) = ph \quad B.2$$

Equation B.2 can be written in the form

$$\frac{dy}{dt} + \left(\frac{1}{p} \frac{dp}{dt}\right)y = h(t) \quad B.3$$

Equations B.1 and B.3 are equivalent only if

$$\frac{1}{p} \frac{dp}{dt} = a(t) \quad B.4$$

Thus the integration factor can be expressed as

$$p = \exp\left(\int a(t) dt\right) \quad B.5$$

Solving equation B.2 yields

$$y = \frac{1}{p} \int p h dt + \frac{C}{p} \quad B.6$$

Where C here is constant of integration. The constant of integration can be determined from initial values. In particular let's assume  $y = y_0$  when  $t = t_0$ , then the solution can be expressed as

$$y(t) = \frac{1}{p(t)} \int_{t_0}^t p(\xi)h(\xi)d\xi + y_0 \frac{p(t_0)}{p(t)} \quad B.7$$

## References

1. Libyan National Center for Disease Control. <https://www.facebook.com/NCDC.LY/>.
2. Libya Coronavirus: 520 Cases and 10 Deaths - Worldometer.  
<https://www.worldometers.info/coronavirus/country/libya/>.
3. Chapra, S. C. & Canale, R. P. *Numerical methods for engineers*. (7<sup>th</sup> Edition) (McGraw-Hill, Singapore, 2015).
